# Supplementary material
Source: Springer Nature journal article supplement (https://www.springermedizin.de/resource/supplementary/13049_2011_321_MOESM1_ESM.pdf/9666340)
Supplement: MOESM1 [file 9666340]

| <b>Process steps</b>        | <b>Pre-patient preparation</b>                                  | <b>Initial examination of patient</b>                                                   | <b>Executing physician orders</b>                                                                  | <b>Decision on diagnose and treatment plan</b>              | <b>Treatment and or observation</b>                         | <b>Discharge To ward/home</b>                              |
|-----------------------------|-----------------------------------------------------------------|-----------------------------------------------------------------------------------------|----------------------------------------------------------------------------------------------------|-------------------------------------------------------------|-------------------------------------------------------------|------------------------------------------------------------|
| <b>Key team behavior</b>    |                                                                 | <i>Take patient history with all team members present.</i>                              | <i>Collaborate and cooperate around patient needs by working in parallel with individual tasks</i> | <i>Rapid execution of plan</i>                              | <i>Reconnect with team members to decide upon discharge</i> |                                                            |
|                             |                                                                 | <i>Design and communicate plan within the team</i>                                      |                                                                                                    | <i>Distinct wrap-up</i>                                     |                                                             |                                                            |
| <b>Team physician</b>       | Read patient records                                            | Take patient history. Design diagnose- and treatment plan and outline monitoring needs. | Register patient data and consult physician on call/GP when needed                                 | Act on test results. Decide on treatment and discharge plan |                                                             | Administer discharge, referrals                            |
| <b>Team nurse (RN)</b>      | Monitor and act on patient flow. Interact with flow coordinator | Blood sampling, vital parameters                                                        | Blood sampling, administer drugs                                                                   | Alert physician on available lab results                    | Act on physician decisions                                  | Contact bed coordinator. Register nursing record and data. |
| <b>Team nurse assistant</b> | Prepare room, walk in patient                                   | Assist team nurse                                                                       | Monitor patient, transportations (lab, patient to x-ray etc)                                       | Alert physician on available lab results                    | Monitor patient, assist team nurse                          | Arrange patient transportation to home. Manage supplies.   |
